# Supplementary material for: Therapeutic targeting of BRCA1 and TP53 mutant breast cancer through mutant p53 reactivation
Source: PubMed Central journal article supplement (PMC6465291; doi:10.1038/s41523-019-0110-1), 2019-04-15
Supplement: 41523_2019_110_MOESM1_ESM.pdf [file 41523_2019_110_MOESM1_ESM.pdf]

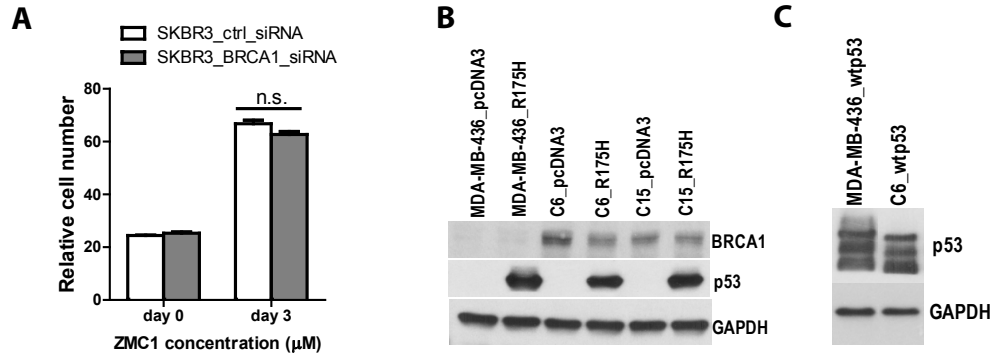

Supplementary Figure S1 (A) The growth inhibition effect of ZMC1 on SKBR3 transfected with control non-target or *BRCA1* siRNA knock down. (B) Western blot showed *BRCA1* and p53<sup>R175H</sup> (R175H) expression in MDA-MB-436 and its *BRCA1* reconstituted cell lines (C6 and C15). (C) Western blotting confirmed the wild type p53 expression in MDA-MB-436 and C6.

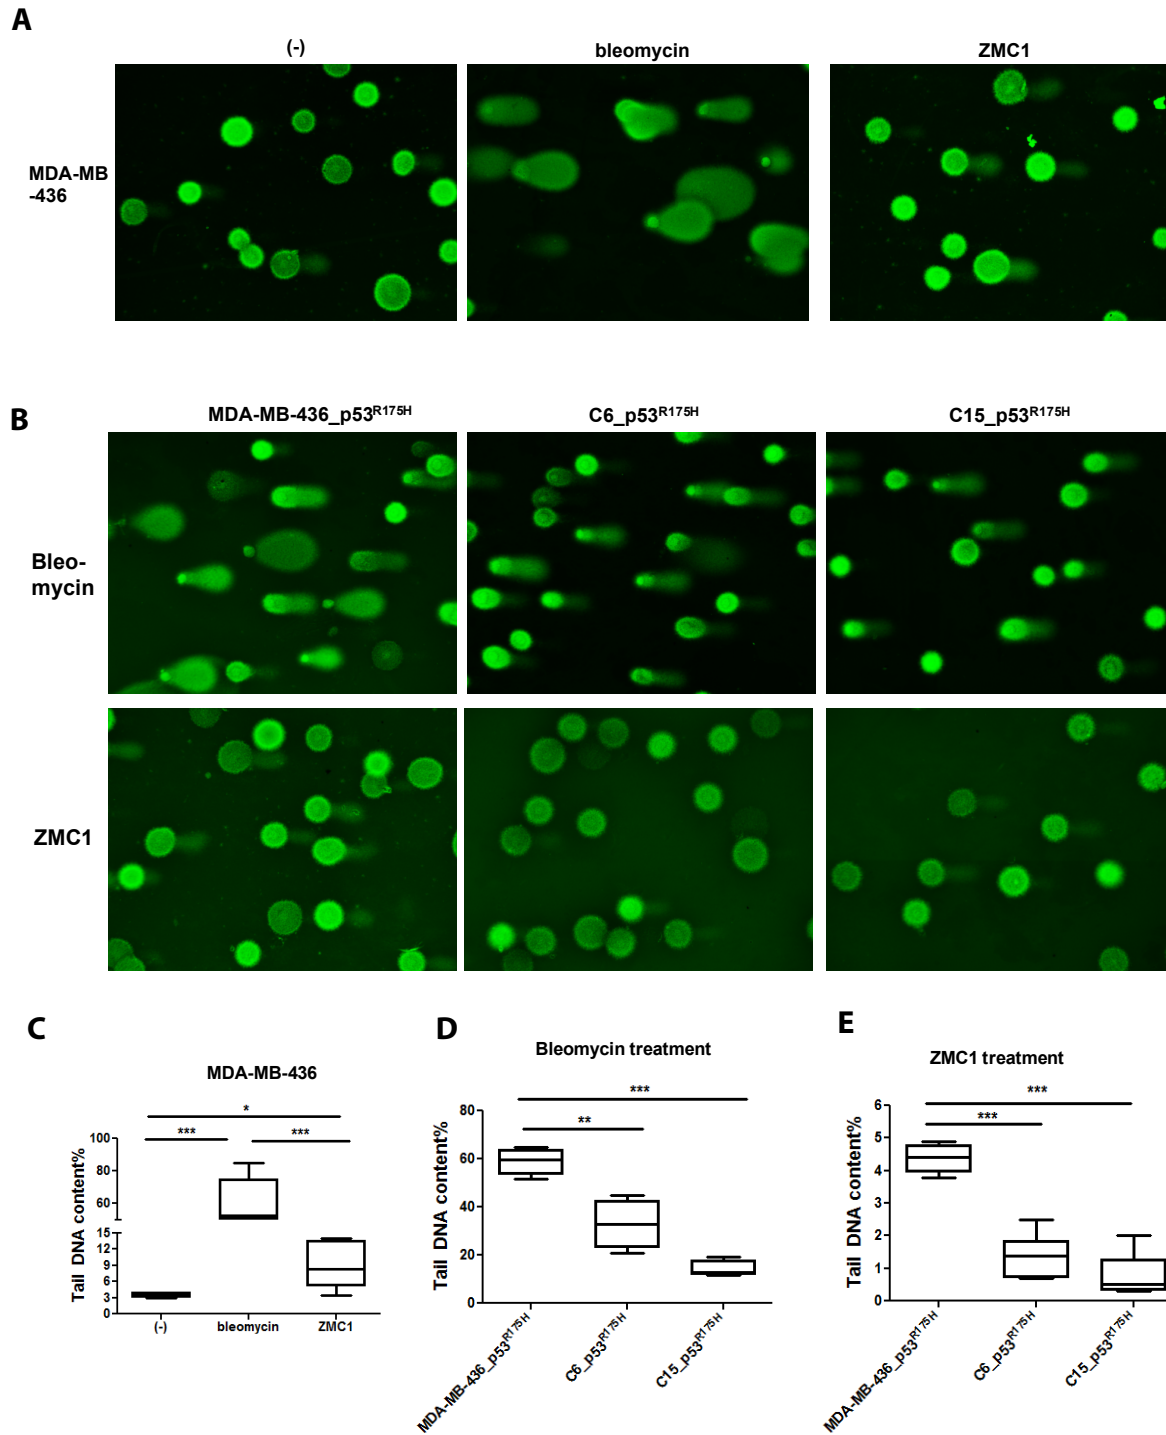

Supplementary Figure S2 Comet assay shows the DNA damage in MDA-MB-436 and its derived cells. (A) DNA damage of MDA-MB-436 treated with 30  $\mu$ M bleomycin for 2 hours and 1  $\mu$ M ZMC1 for 6 hours. (B) The DNA damage of MDA-MB-436\_p53<sup>R175H</sup>, C6\_p53<sup>R175H</sup> and C15\_p53<sup>R175H</sup> treated with 30  $\mu$ M bleomycin for 2 hours (upper panels) or 1  $\mu$ M ZMC1 for 6 hours (lower panels). (C) Quantification of DNA damage in (A). (D) Quantification of DNA damage by 30  $\mu$ M bleomycin for 2 hours in (B) upper panels. (E) Quantification of DNA damage by 1  $\mu$ M ZMC1 for 6 hours in (B) lower panels. Student *t*-test; \*:  $p < 0.05$ ; \*\*:  $p < 0.01$ ; \*\*\*:  $p < 0.001$ .

**A**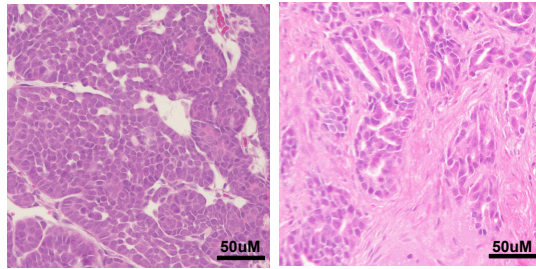**B**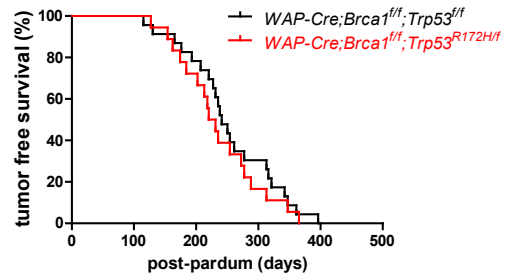

Supplementary Figure S3 *WAP-Cre;Brca1<sup>fl/fl</sup>;p53<sup>R172H/fl</sup>* and *WAP-Cre;Brca1<sup>fl/fl</sup>;p53<sup>fl/fl</sup>* mice developed mammary tumors. (A) Representative histopathology of *WAP-Cre;Brca1<sup>fl/fl</sup>;p53<sup>R172H/fl</sup>* and *WAP-Cre;Brca1<sup>fl/fl</sup>;p53<sup>fl/fl</sup>* mammary tumors by H&E staining. (B) Kaplan-Meier plot shows tumor free survival of *WAP-Cre;Brca1<sup>fl/fl</sup>;p53<sup>R172H/fl</sup>* and *WAP-Cre;Brca1<sup>fl/fl</sup>;p53<sup>fl/fl</sup>* mice.

A

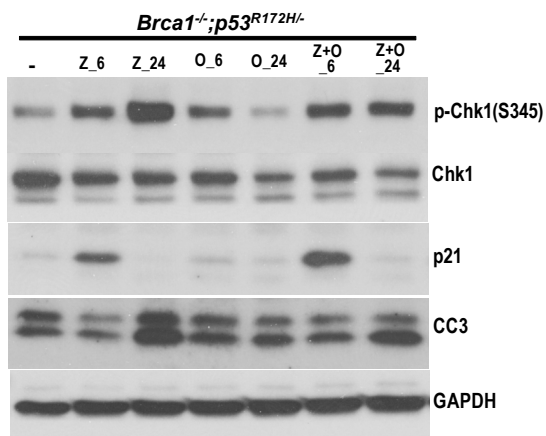

B

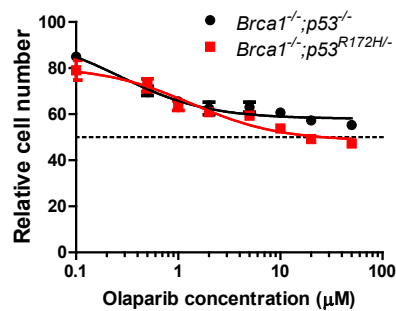

C

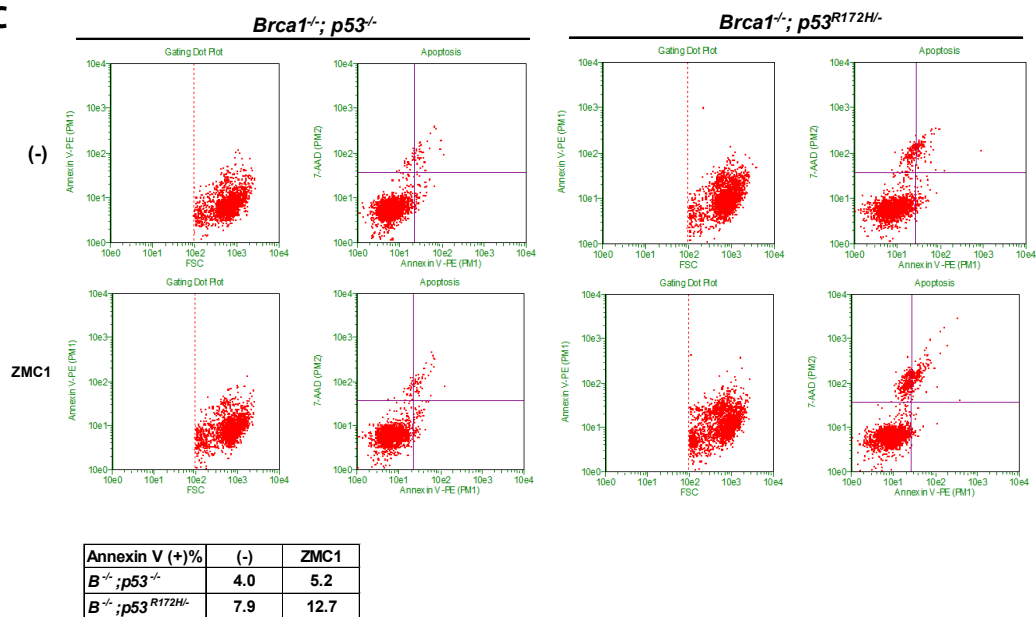

Supplementary Figure S4 (A) Western blotting showed the induction of p-Chk1, p21 and CC3 after 6- and 24-hour treatment of ZMC1 (Z, 1  $\mu\text{M}$ ), olaparib (O, 50  $\mu\text{M}$ ) or ZMC1+olaparib (Z+O) in the *Brca1<sup>-/-</sup>;Trp53<sup>-/-</sup>* and *Brca1<sup>-/-</sup>;Trp53<sup>R172H/-</sup>* cells. 6: 6-hr treatment; 24: 24-hr treatment. (B) Survival of *Brca1<sup>-/-</sup>;Trp53<sup>-/-</sup>* and *Brca1<sup>-/-</sup>;Trp53<sup>R172H/-</sup>* cells with olaparib treatment. (C) Flow cytometry result of Annexin V/PI staining of *Brca1<sup>-/-</sup>;p53<sup>-/-</sup>* and *Brca1<sup>-/-</sup>;p53<sup>R172H/-</sup>* cells treated with ZMC1.

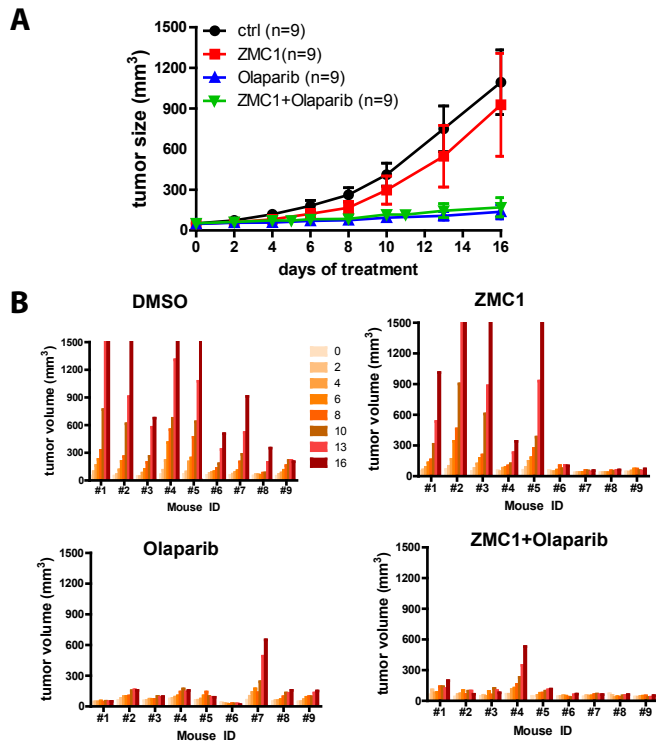

Supplementary Figure S5 Treatment of nude mice bearing implanted *Brca1*<sup>-/-</sup>;*p53*<sup>-/-</sup> breast tumor fragments with either DMSO, ZMC1, olaparib or ZMC1+olaparib. (A) Nude mice carrying implanted *Brca1*<sup>-/-</sup>;*p53*<sup>-/-</sup> tumors were with DMSO (ctrl), ZMC1, Olaparib or ZMC1+Olaparib. (B) Individual tumors (as in A) growth with corresponding treatment.

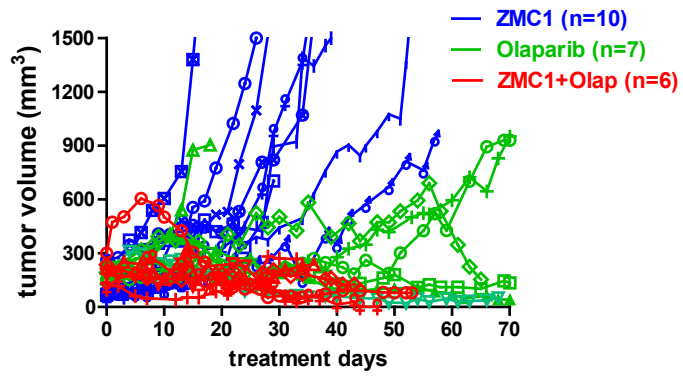

Supplementary Figure S6 Tumor-bearing *WAP-Cre;Brca1<sup>fl</sup>;p53<sup>R172H/fl</sup>* mammary tumor-bearing mice were treated with ZMC1 (2.5 mg/kg/day, n=10), olaparib (50 mg/kg/day, n=7), or ZMC1+olaparib (n=6).

**A**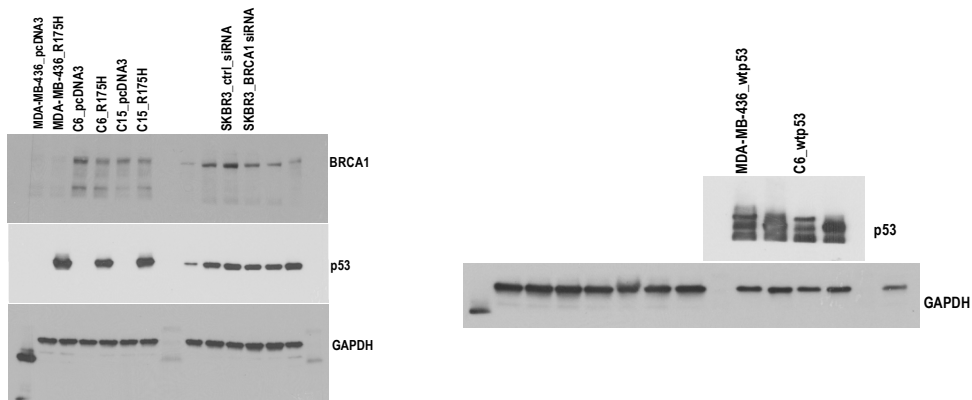**B**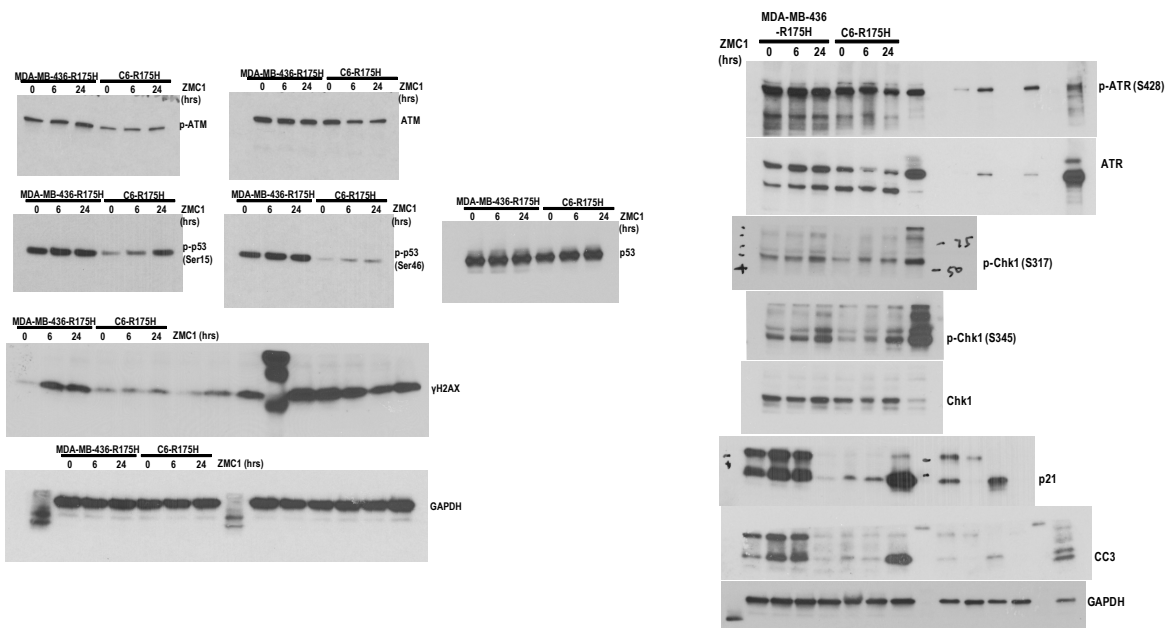**C**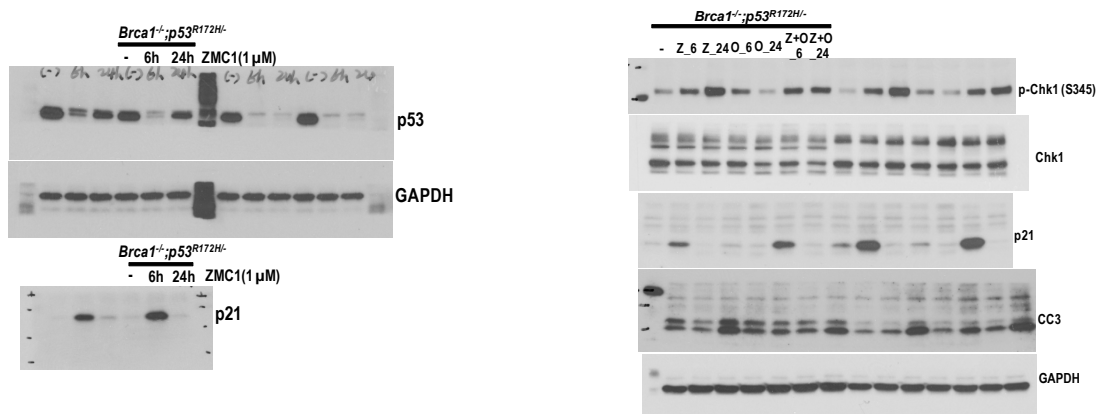

Supplementary Figure S7 Uncropped Western blots for Fig. 1c (A), Supplementary Figure S1B (A) and C (A), Fig. 1f (B), Fig. 2d (C) and Supplementary Figure S4A (C).
